# Supplementary material for: Spectroscopic Study of the Br−+CH3I→I−+CH3Br SN2 Reaction
Source: PubMed Central journal article supplement — Chemphyschem. 2022 Aug 11;23(21):e202200278. doi: 10.1002/cphc.202200278 (PMC9804238; doi:10.1002/cphc.202200278), 2022-08-11
Supplement: CPHC-23-0-s001.pdf [file CPHC-23-0-s001.pdf]

# ChemPhysChem

Supporting Information

## Spectroscopic Study of the $\text{Br}^- + \text{CH}_3\text{I} \rightarrow \text{I}^- + \text{CH}_3\text{Br}$ $\text{S}_{\text{N}}2$ Reaction

Hayden T. Robinson, Timothy R. Corkish, Christian T. Haakansson, Peter D. Watson, Allan J. McKinley, and Duncan A. Wild\*

The supporting information presented here comprises of results from *ab initio* calculations of bromide-iodomethane and iodide-bromomethane gas-phase van der Waals complexes. Included are energies, vibrational data, and cartesian coordinates predicted at the CCSD(T) level of theory, with aug-cc-pVDZ, TZ and QZ basis sets. The aug-cc-pVXZ-PP basis sets were used for bromine and iodine. Collectively, these basis sets are referred to as AVXZ. Also attached is the mass spectrum of the dibromomethane-iodomethane-argon gas mixture with a complete putative assignment of the mass peaks.

Table S1: Energetics of the bare CH<sub>3</sub>Br and CH<sub>3</sub>I molecules, halide anions, and halogen radicals determined from CCSD(T) calculations.

|                                   | Basis Set | $E_{(\text{CCSD(T)})}$<br>[E <sub>h</sub> ] | zpe<br>[kJ mol <sup>-1</sup> ] | VDE<br>[eV] | Experimental SO*<br>[eV] | Split VDE<br>[eV] | Literature <sup>2</sup> P <sub>3/2</sub> VDE<br>[eV] | Shift <sup>†</sup><br>[eV] |
|-----------------------------------|-----------|---------------------------------------------|--------------------------------|-------------|--------------------------|-------------------|------------------------------------------------------|----------------------------|
| CH <sub>3</sub> Br                | AVDZ      | -455.4440699                                |                                |             |                          |                   |                                                      |                            |
|                                   | AVTZ      | -455.5984965                                | 97.9                           |             |                          |                   |                                                      |                            |
|                                   | AVQZ      | -455.6834034                                |                                |             |                          |                   |                                                      |                            |
|                                   | CBS       | -455.7358608                                |                                |             |                          |                   |                                                      |                            |
| CH <sub>3</sub> I                 | AVDZ      | -334.5914504                                |                                |             |                          |                   |                                                      |                            |
|                                   | AVTZ      | -334.7348612                                | 96.2                           |             |                          |                   |                                                      |                            |
|                                   | AVQZ      | -334.8221599                                |                                |             |                          |                   |                                                      |                            |
|                                   | CBS       | -334.8753513                                |                                |             |                          |                   |                                                      |                            |
| Br <sup>-</sup>   Br <sup>•</sup> | AVDZ      | -415.7264357   -415.6061898                 |                                | 3.272       |                          | 3.120   3.577     |                                                      | +0.244                     |
|                                   | AVTZ      | -415.8364248   -415.7132791                 |                                | 3.351       |                          | 3.199   3.656     |                                                      | +0.165                     |
|                                   | AVQZ      | -415.9123563   -415.7853280                 |                                | 3.457       |                          | 3.305   3.762     |                                                      | +0.059                     |
|                                   | CBS       | -415.9599329   -415.8302313                 |                                | 3.529       | -0.152   +0.305          | 3.377   3.834     | 3.364 <sup>a</sup>                                   | -0.013                     |
| I <sup>-</sup>   I <sup>•</sup>   | AVDZ      | -294.8832580   -294.7690621                 |                                | 3.107       |                          | 2.793   3.735     |                                                      | +0.266                     |
|                                   | AVTZ      | -294.9822876   -294.8654129                 |                                | 3.180       |                          | 2.866   3.808     |                                                      | +0.193                     |
|                                   | AVQZ      | -295.0612417   -294.9399749                 |                                | 3.300       |                          | 2.986   3.928     |                                                      | +0.073                     |
|                                   | CBS       | -295.1101148   -294.9859536                 |                                | 3.379       | -0.314   +0.628          | 3.065   4.007     | 3.059 <sup>b</sup>                                   | -0.006                     |

\* A spin-orbit split which is applied to the simulated VDE. It accounts for the point at which two electronic states diverge based on the difference in their total angular momentum quantum number  $j$ , and is calculated from experimental values found at <https://www.nist.gov/pml/handbook-basic-atomic-spectroscopic-data>.

<sup>†</sup> Calculated as the difference between the literature <sup>2</sup>P<sub>3/2</sub> VDE and the simulated <sup>2</sup>P<sub>3/2</sub> VDE.

<sup>a</sup> C. Blondel, P. Cacciani, C. Delsart, R. Trainham, *Phys. Rev. A* **1989**, *40*, 3698-3701.

<sup>b</sup> R. J. Peláez, C. Blondel, C. Delsart, C. Drag, *J. Phys. B: At. Mol. Opt. Phys.* **2009**, *42*, 125001.

Table S2: Energetics of the bromide-iodomethane and iodide-bromomethane van der Waals complexes determined from CCSD(T) calculations.

|                                        | Basis Set | $E_{\text{CCSD(T)}}$<br>[ $E_h$ ] | $D_0$<br>[kJ mol $^{-1}$ ] | VDE<br>[eV]   |
|----------------------------------------|-----------|-----------------------------------|----------------------------|---------------|
| Br $^-$ $\cdots$ H $_3$ CI<br>(Min1)   | AVDZ      | -750.3358743                      |                            |               |
|                                        | AVTZ      | -750.5889156                      |                            |               |
|                                        | AVQZ      | -750.7525126                      |                            |               |
|                                        | CBS       | -750.8535433                      | 47.6                       | 3.841   4.298 |
| Br $^-$ $\cdots$ HCH $_2$ I*<br>(Min2) | AVDZ      |                                   |                            |               |
|                                        | AVTZ      | -750.5882685                      | 43.6                       | 3.762   4.219 |
|                                        | AVQZ      |                                   |                            |               |
|                                        | CBS       |                                   |                            |               |
| Br $^-$ $\cdots$ ICH $_3$<br>(Min3)    | AVDZ      | -750.3291600                      |                            |               |
|                                        | AVTZ      | -750.5839803                      |                            |               |
|                                        | AVQZ      | -750.7477629                      |                            |               |
|                                        | CBS       | -750.8486917                      | 35.7                       | 3.708   4.165 |
| I $^-$ $\cdots$ H $_3$ CBr<br>(Min4)   | AVDZ      | -750.3432191                      |                            |               |
|                                        | AVTZ      | -750.5966038                      |                            |               |
|                                        | AVQZ      | -750.7607204                      |                            |               |
|                                        | CBS       | -750.8621977                      | 42.2                       | 3.441   4.383 |
| I $^-$ $\cdots$ BrCH $_3$<br>(Min5)    | AVDZ      | -750.3295673                      |                            |               |
|                                        | AVTZ      | -750.5838495                      |                            |               |
|                                        | AVQZ      | -750.7478782                      |                            |               |
|                                        | CBS       | -750.8492032                      | 8.6                        | 3.074   4.016 |

\* As was discussed in the main text, due to this complex lying in a region of the potential energy surface that changes due to the basis set used, only the AVTZ energies have been listed.

Table S3: Energetics of the transition structures along the back-side reaction coordinate determined from CCSD(T) calculations.

|                                                | Basis Set | $E_{(\text{CCSD(T)})}$<br>[ $E_h$ ] | $\Delta E_{\text{forward}}^\dagger$<br>[kJ mol $^{-1}$ ] | $\Delta E_{\text{reverse}}^\dagger$<br>[kJ mol $^{-1}$ ] |
|------------------------------------------------|-----------|-------------------------------------|----------------------------------------------------------|----------------------------------------------------------|
|                                                | AVDZ      | -750.3246933                        |                                                          |                                                          |
| [Br $\cdots$ CH $_3$ $\cdots$ I] $^-$<br>(TS1) | AVTZ      | -750.5765710                        |                                                          |                                                          |
|                                                | AVQZ      | -750.7396590                        |                                                          |                                                          |
|                                                | CBS       | -750.8405848                        | 32.6                                                     | 53.6                                                     |
|                                                | AVDZ      |                                     |                                                          |                                                          |
| Br $^-$ $\cdots$ HCH $_2$ I*<br>(TS2)          | AVTZ      | -750.5882214                        | -0.4                                                     | 2.0                                                      |
|                                                | AVQZ      |                                     |                                                          |                                                          |
|                                                | CBS       |                                     |                                                          |                                                          |

\* As was discussed in the main text, due to this transition structure lying in a region of the potential energy surface that changes due to the basis set used, only the AVTZ energies have been listed.

$^\dagger$  Zero-point corrected.

Table S4: Vibrational frequencies, in cm $^{-1}$ , and zero point energies (zpe), in kJ mol $^{-1}$ , of the bare CH $_3$ Br and CH $_3$ I molecules, determined from CCSD(T)/AVTZ calculations.

|            | Symmetry | CH $_3$ Br | CH $_3$ I |
|------------|----------|------------|-----------|
| $\omega_1$ | A $_1$   | 3084       | 3085      |
| $\omega_2$ | A $_1$   | 1345       | 1290      |
| $\omega_3$ | A $_1$   | 625        | 556       |
| $\omega_4$ | E        | 3192       | 3196      |
| $\omega_5$ | E        | 3192       | 3196      |
| $\omega_6$ | E        | 1490       | 1481      |
| $\omega_7$ | E        | 1490       | 1481      |
| $\omega_8$ | E        | 973        | 896       |
| $\omega_9$ | E        | 973        | 896       |
| zpe        |          | 98         | 96        |

Table S5: Vibrational frequencies, in  $\text{cm}^{-1}$ , and zero point energies (zpe), in  $\text{kJ mol}^{-1}$ , of the bromide-iodomethane and iodide-bromomethane van der Waals complexes determined from CCSD(T)/AVTZ calculations.

|               | $\text{Br}^- \cdots \text{H}_3\text{CI}$ |           | $\text{Br}^- \cdots \text{HCH}_2\text{I}$ |           | $\text{Br}^- \cdots \text{ICH}_3$ |           | $\text{I}^- \cdots \text{H}_3\text{CBr}$ |           | $\text{I}^- \cdots \text{BrCH}_3$ |           |
|---------------|------------------------------------------|-----------|-------------------------------------------|-----------|-----------------------------------|-----------|------------------------------------------|-----------|-----------------------------------|-----------|
|               | (Min1)                                   |           | (Min2)                                    |           | (Min3)                            |           | (Min4)                                   |           | (Min5)                            |           |
|               | Symmetry                                 | Frequency | Symmetry                                  | Frequency | Symmetry                          | Frequency | Symmetry                                 | Frequency | Symmetry                          | Frequency |
| $\omega_1$    | $A_1$                                    | 3121      | $A'$                                      | 3167      | $A_1$                             | 3050      | $A_1$                                    | 3114      | $A_1$                             | 3058      |
| $\omega_2$    | $A_1$                                    | 1223      | $A'$                                      | 3043      | $A_1$                             | 1245      | $A_1$                                    | 1292      | $A_1$                             | 1320      |
| $\omega_3$    | $A_1$                                    | 477       | $A'$                                      | 1467      | $A_1$                             | 516       | $A_1$                                    | 552       | $A_1$                             | 609       |
| $\omega_4$    | $A_1$                                    | 70        | $A'$                                      | 1296      | $A_1$                             | 86        | $A_1$                                    | 62        | $A_1$                             | 52        |
| $\omega_5$    | E                                        | 3246      | $A'$                                      | 889       | E                                 | 3147      | E                                        | 3235      | E                                 | 3155      |
| $\omega_6$    | E                                        | 3246      | $A'$                                      | 529       | E                                 | 3147      | E                                        | 3235      | E                                 | 3155      |
| $\omega_7$    | E                                        | 1457      | $A'$                                      | 105       | E                                 | 1478      | E                                        | 1470      | E                                 | 1489      |
| $\omega_8$    | E                                        | 1457      | $A'$                                      | 25        | E                                 | 1478      | E                                        | 1470      | E                                 | 1489      |
| $\omega_9$    | E                                        | 860       | $A''$                                     | 3197      | E                                 | 840       | E                                        | 939       | E                                 | 947       |
| $\omega_{10}$ | E                                        | 860       | $A''$                                     | 1489      | E                                 | 840       | E                                        | 939       | E                                 | 947       |
| $\omega_{11}$ | E                                        | 56        | $A''$                                     | 908       | E                                 | 86        | E                                        | 58        | E                                 | 65        |
| $\omega_{12}$ | E                                        | 56        | $A''$                                     | 135       | E                                 | 86        | E                                        | 58        | E                                 | 65        |
| zpe           |                                          | 96        |                                           | 97        |                                   | 96        |                                          | 98        |                                   | 98        |

Table S6: Vibrational frequencies, in  $\text{cm}^{-1}$ , and zero point energies (zpe), in  $\text{kJ mol}^{-1}$ , of the transition structures along the back-side reaction coordinate determined from CCSD(T)/AVTZ calculations.

|               | $[\text{Br}\cdots\text{CH}_3\cdots\text{I}]^-$<br>(TS1) |           | $\text{Br}^- \cdots \text{HCH}_2\text{I}$<br>(TS2) |           |
|---------------|---------------------------------------------------------|-----------|----------------------------------------------------|-----------|
|               | Symmetry                                                | Frequency | Symmetry                                           | Frequency |
| $\omega_1$    | $A_1$                                                   | $418i$    | $A'$                                               | $35i$     |
| $\omega_2$    | $A_1$                                                   | 3184      | $A'$                                               | 3198      |
| $\omega_3$    | $A_1$                                                   | 929       | $A'$                                               | 3080      |
| $\omega_4$    | $A_1$                                                   | 126       | $A'$                                               | 1463      |
| $\omega_5$    | E                                                       | 3378      | $A'$                                               | 1273      |
| $\omega_6$    | E                                                       | 3378      | $A'$                                               | 860       |
| $\omega_7$    | E                                                       | 1405      | $A'$                                               | 520       |
| $\omega_8$    | E                                                       | 1405      | $A'$                                               | 77        |
| $\omega_9$    | E                                                       | 884       | $A''$                                              | 3209      |
| $\omega_{10}$ | E                                                       | 884       | $A''$                                              | 1477      |
| $\omega_{11}$ | E                                                       | 161       | $A''$                                              | 899       |
| $\omega_{12}$ | E                                                       | 161       | $A''$                                              | 102       |
| zpe           |                                                         | 95        |                                                    | 97        |

Table S7: Cartesian coordinates, in  $\text{\AA}$ , of the bare  $\text{CH}_3\text{Br}$  and  $\text{CH}_3\text{I}$  molecules determined from CCSD(T)/AVTZ calculations.

| Atom | $x$         | $y$         | $z$         |
|------|-------------|-------------|-------------|
| C    | 1.61802988  | 0.00000000  | 0.00000000  |
| H    | 1.94876298  | -0.51702176 | -0.89550797 |
| H    | 1.94876298  | -0.51702176 | 0.89550797  |
| H    | 1.94876298  | 1.03404353  | 0.00000000  |
| Br   | -0.32069093 | 0.00000000  | 0.00000000  |
| C    | 1.90493010  | 0.00000000  | 0.00000000  |
| H    | 2.23256162  | -0.51735931 | -0.89609261 |
| H    | 2.23256162  | -0.51735931 | 0.89609261  |
| H    | 2.23256162  | 1.03471862  | 0.00000000  |
| I    | -0.23331924 | 0.00000000  | 0.00000000  |

Table S8: Cartesian coordinates, in Å, of the bromide-iodomethane and iodide-bromomethane van der Waals complexes determined from CCSD(T)/AVTZ calculations.

| Complex                                         | Atom | $x$         | $y$         | $z$         |
|-------------------------------------------------|------|-------------|-------------|-------------|
| Br <sup>-</sup> ···H <sub>3</sub> CI<br>(Min1)  | C    | -0.10260222 | 0.00000000  | 0.00000000  |
|                                                 | H    | -0.42343898 | -0.51673107 | -0.89500447 |
|                                                 | H    | -0.42343898 | -0.51673107 | 0.89500447  |
|                                                 | H    | -0.42343898 | 1.03346215  | 0.00000000  |
|                                                 | Br   | -3.30283991 | 0.00000000  | 0.00000000  |
|                                                 | I    | 2.07373395  | 0.00000000  | 0.00000000  |
| Br <sup>-</sup> ···HCH <sub>2</sub> I<br>(Min2) | C    | -0.11513498 | -0.98448038 | 0.00000000  |
|                                                 | H    | -0.11009201 | -1.59500824 | -0.89763811 |
|                                                 | H    | -0.11009201 | -1.59500824 | 0.89763811  |
|                                                 | H    | 0.70940820  | -0.27029630 | 0.00000000  |
|                                                 | Br   | 3.20932327  | 0.07047297  | 0.00000000  |
|                                                 | I    | -1.98878636 | 0.07674706  | 0.00000000  |
| Br <sup>-</sup> ···ICH <sub>3</sub><br>(Min3)   | C    | -3.17401844 | 0.00000000  | 0.00000000  |
|                                                 | H    | -3.52449990 | 0.51535049  | -0.89261323 |
|                                                 | H    | -3.52449990 | 0.51535049  | 0.89261323  |
|                                                 | H    | -3.52449990 | -1.03070098 | 0.00000000  |
|                                                 | Br   | 2.22901699  | 0.00000000  | 0.00000000  |
|                                                 | I    | -1.00205966 | 0.00000000  | 0.00000000  |
| I <sup>-</sup> ···H <sub>3</sub> CBr<br>(Min4)  | C    | 1.29720364  | 0.00000000  | 0.00000000  |
|                                                 | H    | 0.96970005  | -0.51611717 | -0.89394116 |
|                                                 | H    | 0.96970005  | -0.51611717 | 0.89394116  |
|                                                 | H    | 0.96970005  | 1.03223434  | 0.00000000  |
|                                                 | Br   | 3.26936141  | 0.00000000  | 0.00000000  |
|                                                 | I    | -2.17888987 | 0.00000000  | 0.00000000  |
| I <sup>-</sup> ···BrCH <sub>3</sub><br>(Min5)   | C    | -3.86933500 | 0.00000000  | 0.00000000  |
|                                                 | H    | -4.21676357 | 0.51552501  | -0.89291552 |
|                                                 | H    | -4.21676357 | 0.51552501  | 0.89291552  |
|                                                 | H    | -4.21676357 | -1.03105003 | 0.00000000  |
|                                                 | Br   | -1.92252107 | 0.00000000  | 0.00000000  |
|                                                 | I    | 1.66190725  | 0.00000000  | 0.00000000  |



Table S9: Cartesian coordinates, in Å, of the transition structures along the back-side reaction coordinate determined from CCSD(T)/AVTZ calculations.

| Structure                                   | Atom | $x$         | $y$         | $z$         |
|---------------------------------------------|------|-------------|-------------|-------------|
| [Br $\cdots$ CH $_3\cdots$ I] $^-$<br>(TS1) | C    | -0.60812386 | 0.00000000  | 0.00000000  |
|                                             | H    | -0.62942076 | -0.53632137 | -0.92893587 |
|                                             | H    | -0.62942076 | -0.53632137 | 0.92893587  |
|                                             | H    | -0.62942076 | 1.07264275  | 0.00000000  |
|                                             | Br   | -3.09053131 | 0.00000000  | 0.00000000  |
|                                             | I    | 1.99441444  | 0.00000000  | 0.00000000  |
| Br $^- \cdots$ HCH $_2$ I<br>(TS2)          | C    | -0.03590686 | -0.72732770 | 0.00000000  |
|                                             | H    | 0.67646441  | 0.09328675  | 0.00000000  |
|                                             | H    | 0.06274930  | -1.32775737 | 0.89807778  |
|                                             | H    | 0.06274930  | -1.32775737 | -0.89807778 |
|                                             | Br   | 3.28714497  | 0.05450385  | 0.00000000  |
|                                             | I    | -2.04715690 | 0.05522939  | 0.00000000  |

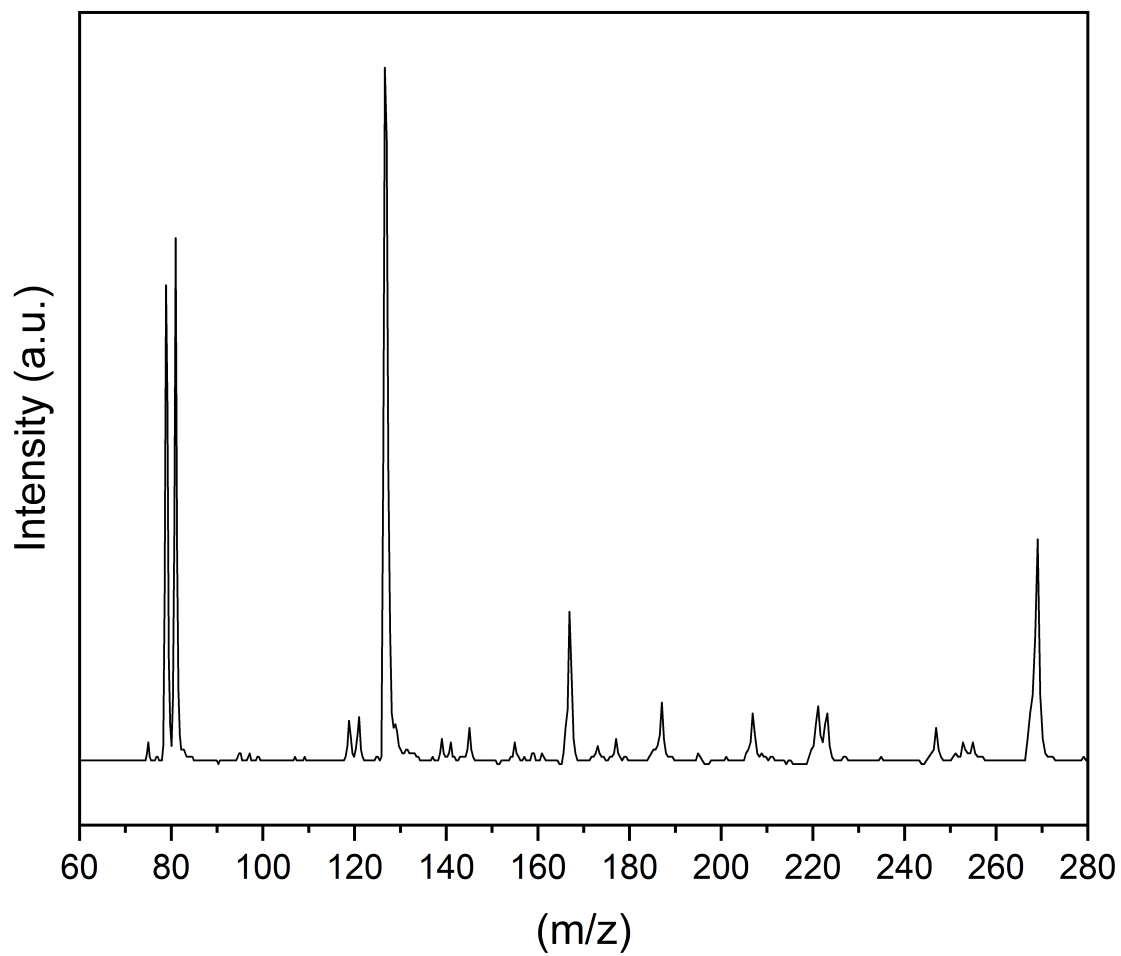

Figure S1: Negative ion mass spectrum recorded from a gas mixture containing dibromomethane, iodomethane and argon, which was used to form the  $S_N2$  reaction intermediates observed at 221 m/z and 223 m/z.

Table S10: Putative peak assignments of dibromomethane-iodomethane-argon gas mixture.

| Position<br>( $m/z$ ) | Assignment                                                                                                                 |
|-----------------------|----------------------------------------------------------------------------------------------------------------------------|
| 74.98                 | $^{35}\text{Cl}^- \dots \text{Ar}$                                                                                         |
| 76.89                 | $^{37}\text{Cl}^- \dots \text{Ar}$                                                                                         |
| 78.89                 | $^{79}\text{Br}^-$                                                                                                         |
| 80.93                 | $^{81}\text{Br}^-$                                                                                                         |
| 94.96                 | $^{35}\text{Cl}^- \dots \text{OCS}$                                                                                        |
| 97.01                 | $^{37}\text{Cl}^- \dots \text{OCS}, ^{79}\text{Br}^- \dots \text{H}_2\text{O}$                                             |
| 98.89                 | $^{81}\text{Br}^- \dots \text{H}_2\text{O}$                                                                                |
| 106.98                | $^{79}\text{Br}^- \dots \text{N}_2$                                                                                        |
| 109.01                | $^{81}\text{Br}^- \dots \text{N}_2$                                                                                        |
| 118.79                | $^{79}\text{Br}^- \dots \text{Ar}$                                                                                         |
| 120.93                | $^{81}\text{Br}^- \dots \text{Ar}$                                                                                         |
| 126.80                | $^{127}\text{I}^-$                                                                                                         |
| 138.97                | $^{79}\text{Br}^- \dots \text{OCS}$                                                                                        |
| 141.01                | $^{81}\text{Br}^- \dots \text{OCS}$                                                                                        |
| 145.02                | $^{127}\text{I}^- \dots \text{H}_2\text{O}$                                                                                |
| 154.97                | $^{127}\text{I}^- \dots \text{N}_2$                                                                                        |
| 158.97                | $^{79}\text{Br}^- \dots (\text{Ar})_2$                                                                                     |
| 160.93                | $^{81}\text{Br}^- \dots (\text{Ar})_2$                                                                                     |
| 166.89                | $^{127}\text{I}^- \dots \text{Ar}$                                                                                         |
| 173.11                | $^{127}\text{I}^- \dots \text{N}_2(\text{H}_2\text{O})$                                                                    |
| 177.02                | $^{35}\text{Cl}^- \dots \text{CH}_3\text{I}$                                                                               |
| 179.09                | $^{37}\text{Cl}^- \dots \text{CH}_3\text{I}$                                                                               |
| 187.06                | $^{127}\text{I}^- \dots \text{OCS}$                                                                                        |
| 194.96                | $^{127}\text{I}^- \dots \text{N}_2(\text{Ar})$                                                                             |
| 206.88                | $^{127}\text{I}^- \dots (\text{Ar})_2$                                                                                     |
| 221.11                | $^{79}\text{Br}^- \dots \text{CH}_3\text{I}$                                                                               |
| 223.15                | $^{81}\text{Br}^- \dots \text{CH}_3\text{I}$                                                                               |
| 246.88                | $^{127}\text{I}^- \dots (\text{Ar})_3$                                                                                     |
| 250.98                | $^{79}\text{Br}^- \dots \text{CH}_2(^{79}\text{Br})_2$                                                                     |
| 252.76                | $^{79}\text{Br}^- \dots \text{CH}_2(^{79}\text{Br})(^{81}\text{Br}), ^{81}\text{Br}^- \dots \text{CH}_2(^{79}\text{Br})_2$ |
| 254.88                | $^{79}\text{Br}^- \dots \text{CH}_2(^{81}\text{Br})_2, ^{81}\text{Br}^- \dots \text{CH}_2(^{79}\text{Br})(^{81}\text{Br})$ |
| 256.87                | $^{81}\text{Br}^- \dots \text{CH}_2(^{81}\text{Br})_2$                                                                     |
| 269.02                | $^{127}\text{I}^- \dots \text{CH}_3\text{I}$                                                                               |
